# Supplementary material for: Auto-Adhesion Potential of Extraocular Aqp0 during Teleost Development
Source: PLOS journal article supplement (doi:10.1371/journal.pone.0154592), 2016-05-06
Supplement: S2 (10.1371/journal.pone.0154592.s002) [file journal.pone.0154592.s002]

**S1 Table: Amino acid identity of Aqp0a1/2 C-terminal immunoreactive peptide compared to other Atlantic salmon aquaporin paralogs**

| <b>Paralog</b> | <b>% identity</b> |
|----------------|-------------------|
| Aqp0a1/2       | 100.0             |
| Aqp0b1/2       | 75.0              |
| Aqp1aa1/2      | 22.5              |
| Aqp1ab-1/2     | 20.0              |
| Aqp15-1/2      | 20.0              |
| Aqp4a1/2       | 5.0               |
| Aqp4b1/2       | 10.0              |
| Aqp14          | 0.0               |
| Aqp8aa1/2      | 0.0               |
| Aqp8ab1/2      | 0.0               |
| Aqp8ba1/2      | 0.0               |
| Aqp8bb1/2      | 0.0               |
| Aqp3a1/2       | 2.5               |
| Aqp3b1/2       | 2.5               |
| Aqp7           | 0.0               |
| Aqp9a1/2       | 10.0              |
| Aqp9b1/2       | 7.5               |
| Aqp10a1/2      | 15.0              |
| Aqp10b1/2      | 5.0               |
| Aqp11a1/2      | 5.0               |
| Aqp11b1/2      | 10.0              |
| Aqp12-1/2      | 5.0               |
